# Supplementary material
Source: publisher figshare collection journal article supplement (https://acs.figshare.com/ndownloader/files/13064150)
Supplement: Supplementary file 1 [file 13064150]

## **Supporting Information**

### **Thionoesters: A Native Chemical Ligation-Inspired Approach to Cysteine-Triggered H<sub>2</sub>S Donors**

Matthew M. Cerda, Yu Zhao, Michael D. Pluth

Contact Information:

Michael D. Pluth

pluth@uoregon.edu

#### **Table of Contents**

|                                                   | <b>Page</b> |
|---------------------------------------------------|-------------|
| <b>1.</b> Synthesis and compound characterization | <b>S2</b>   |
| <b>2.</b> NMR Spectra                             | <b>S3</b>   |
| <b>3.</b> MBA Experimental Details                | <b>S4</b>   |
| <b>4.</b> MBA of structurally related compounds   | <b>S5</b>   |
| <b>5.</b> Reaction Product Analysis               | <b>S5</b>   |
| <b>6.</b> Reaction Product Analysis via HPLC      | <b>S6</b>   |

## Materials and Methods.

Reagents were purchased from Sigma-Aldrich, Tokyo Chemical Industry (TCI) or VWR and used directly as received. *S*-Phenyl benzothioate was synthesized according to a previous report.<sup>1</sup> *N*-phenylthiobenzamide was synthesized according to a previous report.<sup>2</sup> Methyl 2-phenyl-4,5-dihydrothiazole-4-carboxylate (**CysDHT**) was synthesized according to a previous report.<sup>3</sup> Deuterated solvents were purchased from Cambridge Isotope Laboratories and used as received. <sup>1</sup>H and <sup>13</sup>C{<sup>1</sup>H} NMR spectra were recorded on a Bruker 500 MHz instrument. Chemical shifts are reported relative to residual protic solvent resonances. Silica gel (SiliaFlash F60, Silicycle, 230-400 mesh) was used for column chromatography. All air-free manipulations were performed under an inert atmosphere using standard Schlenk technique or an Innovative Atmospheres N<sub>2</sub>-filled glove box. UV-Vis spectra were acquired on an Agilent Cary 60 UV-Vis spectrophotometer equipped with a Quantum Northwest TC-1 temperature controller at 25 °C ± 0.05 °C.

## Synthesis

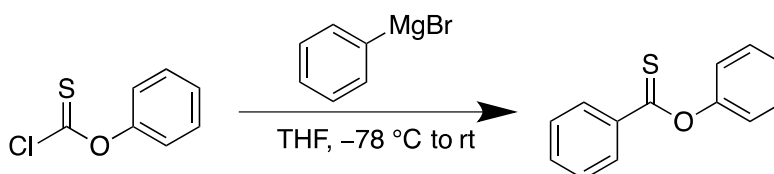

*O*-Phenyl benzothioate (**DPTE**) was synthesized using a slightly-modified procedure.<sup>1</sup> Phenyl chlorothionoformate (14.8 mmol, 1.1 equiv.) was added to anhydrous THF (20 mL) at -78 °C under N<sub>2</sub>. While stirring, phenylmagnesium bromide (12.8 mmol, 1.0 M in THF, 1.0 equiv.) was added dropwise, and the reaction solution was stirred for 1 h at -78 °C. After 1 h, the reaction solution was allowed to warm to room temperature and stirred for an additional 2 h. The reaction was then quenched by addition of deionized H<sub>2</sub>O (30 mL) and extracted with CH<sub>2</sub>Cl<sub>2</sub> (3 x 30 mL). The combined organic extractions were washed with brine (30 mL), and dried over MgSO<sub>4</sub>. After filtration, the solvent was removed under reduced pressure, and the desired product purified by column chromatography (10% CH<sub>2</sub>Cl<sub>2</sub> in hexanes, *R<sub>f</sub>* = 0.33). The resultant product was isolated as a bright orange-yellow liquid. 938 mg (34%). <sup>1</sup>H NMR (500 MHz, CDCl<sub>3</sub>) δ: 8.37 (d, *J* = 7.3 Hz, 2H), 7.63 (t, *J* = 7.5 Hz, 1H), 7.48 (q, *J* = 7.2 Hz, 4H), 7.33 (t, *J* = 7.4 Hz, 1H), 7.14 (d, *J* = 7.5 Hz, 2H). <sup>13</sup>C{<sup>1</sup>H} NMR (126 MHz, CDCl<sub>3</sub>) δ: 211.22, 155.03, 138.11, 133.46, 129.76, 129.44, 128.42, 126.53, 122.31. HRMS-EI<sup>+</sup> (*m/z*): [*M* + H]<sup>+</sup> calcd for C<sub>13</sub>H<sub>10</sub>OS, 214.04524; found, 214.04478.

## HPLC Analysis.

HPLC analysis was performed on an Agilent 1260 HPLC instrument with a Poroshell 120 EC-C18 4.6x100 mm column and monitored at 280 nm. Solvent A: 95% H<sub>2</sub>O, 5% MeOH, Solvent B: 100% MeCN. Gradient: 35% Solvent A/65% Solvent B for 2 min. Change to 100% Solvent B over 4 min and hold for 6.5 min. Change to 35% Solvent A/65% Solvent B over 0.5 min and hold for 4.5 min. Flow Rate: 0.5 mL/min, 2 μL injection.

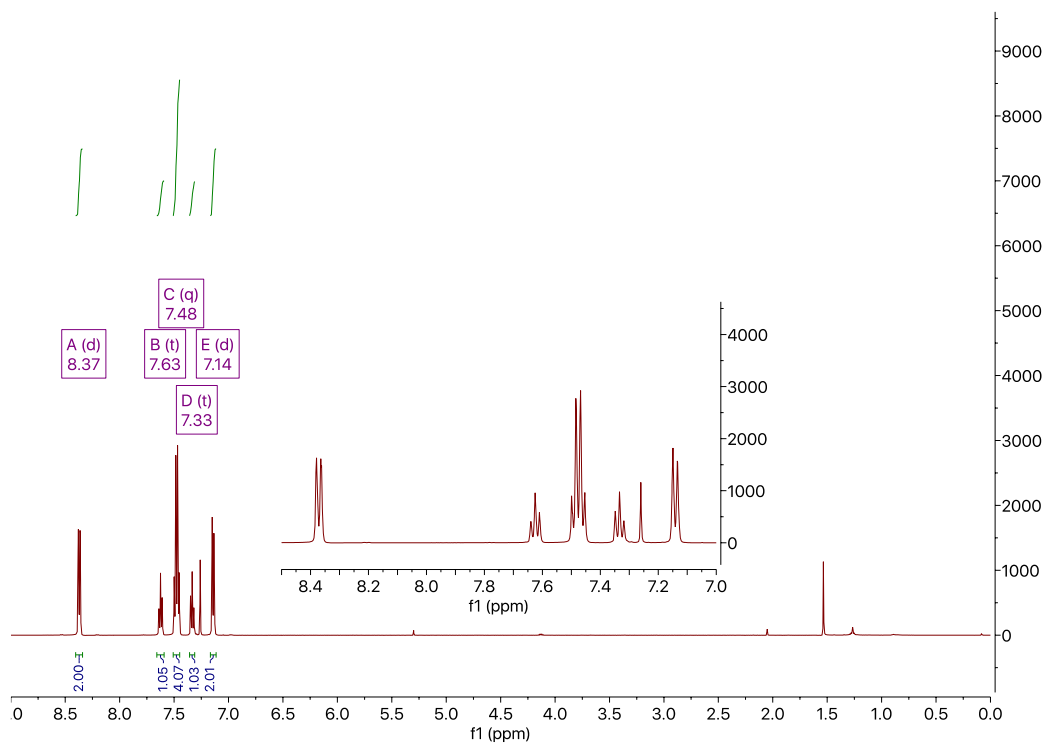

**Figure S1.**  $^1\text{H}$  NMR (500 MHz,  $\text{CDCl}_3$ ) spectrum of **DPTE**.

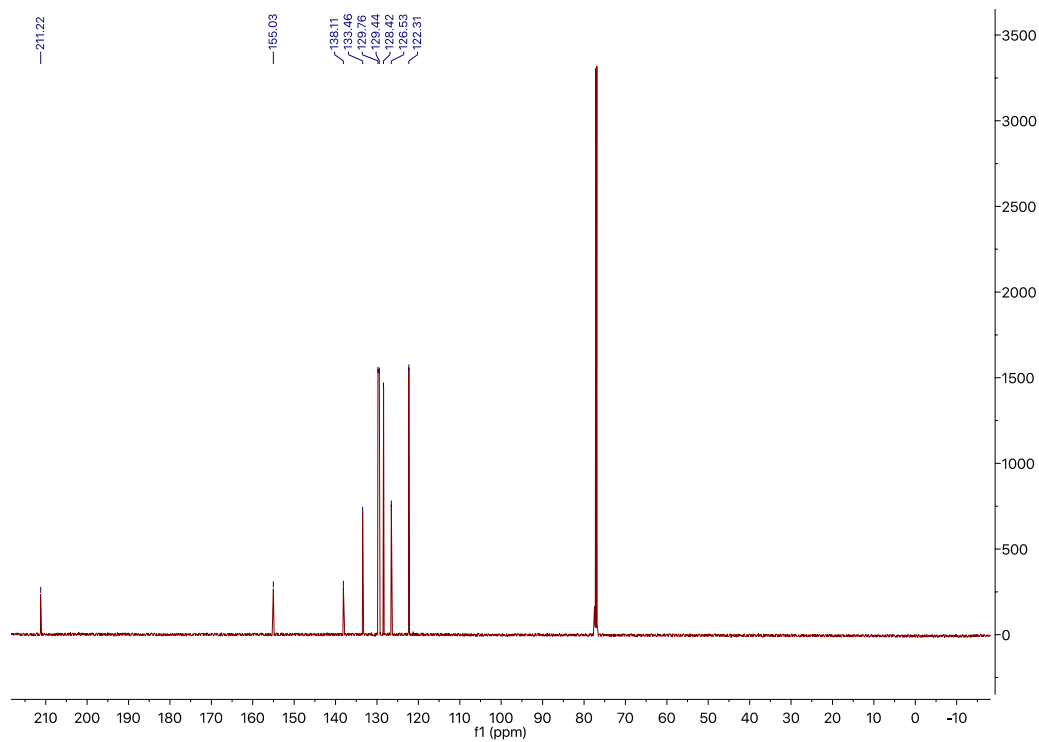

**Figure S2.**  $^{13}\text{C}\{^1\text{H}\}$  NMR (126 MHz,  $\text{CDCl}_3$ ) spectrum of **DPTE**.

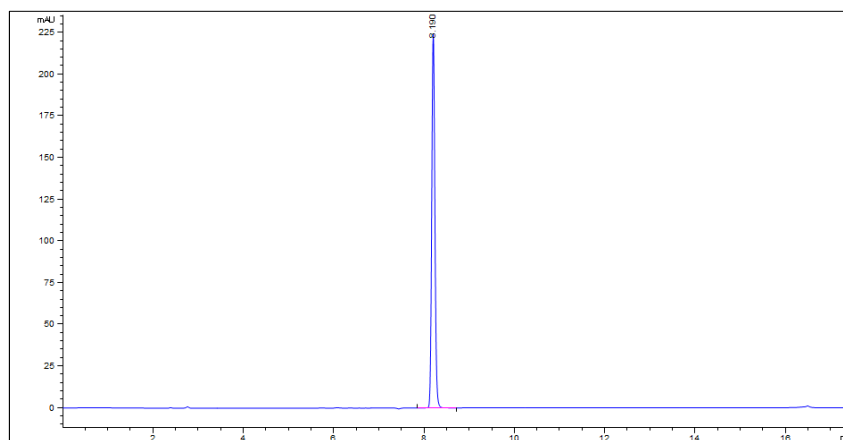

**Figure S3.** HPLC trace of DPTE.

**H<sub>2</sub>S Detection Materials and Methods.** Phosphate buffered saline (PBS) tablets (1X, CalBioChem) were used to prepare buffered solutions (140 mM NaCl, 3 mM KCl, 10 mM phosphate, pH 7.4) in deionized water. Buffer solutions were sparged with N<sub>2</sub> to remove dissolved oxygen and stored in an N<sub>2</sub>-filled glovebox. Donor stock solutions (in DMSO) were prepared inside an N<sub>2</sub>-filled glovebox and stored at -25 °C until immediately before use. Trigger stock solutions (in PBS) were freshly prepared in an N<sub>2</sub>-filled glovebox immediately before use.

**General Procedure for Measuring H<sub>2</sub>S Release via Methylene Blue Assay (MBA).** Scintillation vials containing 20 mL of PBS were prepared in an N<sub>2</sub>-filled glovebox. To these solutions, 20 µL of 500 mM analyte stock solution (in PBS) was added for a final concentration of 500 µM. While stirring, the solutions were allowed to thermally equilibrate in heating block at the desired temperature for approximately 20-30 min. Immediately prior to donor addition, 0.5 mL solution of the methylene blue cocktail were prepared in disposable 1.5 mL cuvettes. The methylene blue cocktail solution contained: 200 µL of 30 mM FeCl<sub>3</sub> in 1.2 M HCl, 200 µL of 20 mM *N,N*-dimethyl-*p*-phenylene diamine in 7.2 M HCl, and 100 µL of 1% (w/v) Zn(OAc)<sub>2</sub>. To begin an experiment, 20 µL of 25 mM donor stock solution (in DMSO) was added for a final concentration of 25 µM. At set time points after the addition of donor, 500 µL reaction aliquots were added to the methylene blue cocktail solutions and incubated for 1 h at room temperature shielded from light. Absorbance values at 670 nm were measured 1 h after addition of reaction aliquot. Each experiment was performed in quadruplicate unless stated otherwise.

**MBA Calibration Curve.** Solutions containing 0.5 mL of the methylene blue cocktail and 0.5 mL PBS containing 500 µM cysteine were freshly prepared in disposable cuvettes (1.5 mL). Under inert conditions, a 10 mM stock solution of NaSH (Strem Chemicals) in PBS was prepared and diluted to 1 mM. Immediately after dilution, 1 mM NaSH was added to 1.0 mL solutions for final concentrations of 10, 20, 30, 40, and 50 µM. Solutions were mixed thoroughly, incubated at room temperature for 1 h, and shielded from light. Absorbance values at 670 nm were measured after 1 h.

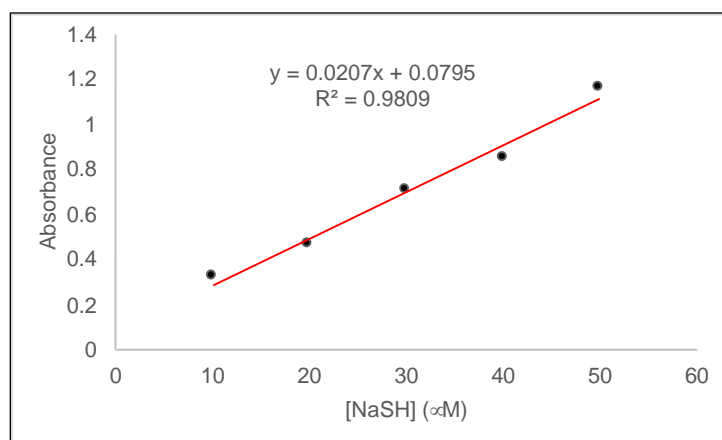

**Figure S4.** MBA calibration curve generated using known concentrations of NaSH.

### Reaction Product Analysis

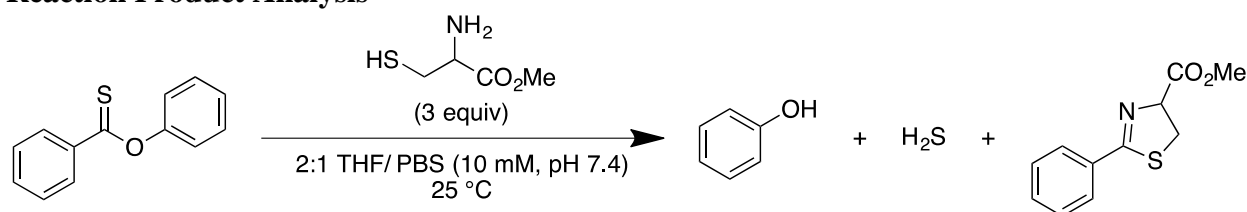

**DPTE** (0.39 mmol, 1.0 equiv.) was dissolved in 15 mL of 2:1 THF/PBS (10 mM, pH 7.4). L-cysteine methyl ester hydrochloride (1.17 mmol, 3.0 equiv.) was added in a single portion and stirred at room temperature for 2 h. The reaction mixture was diluted with deionized H<sub>2</sub>O (~ 20 mL) and extracted with CH<sub>2</sub>Cl<sub>2</sub> (3 x 20 mL). The combined organic extracts were washed with brine and dried over MgSO<sub>4</sub>. After filtration, the solvent was removed under reduced pressure, and the purified by preparative thin layer chromatography (1:1 CH<sub>2</sub>Cl<sub>2</sub> in hexanes). **DPTE**  $R_f$  = 0.75 (63.6 mg, 76%) and **CysDHT**  $R_f$  = 0.03 (11.0 mg, 13%) were isolated and characterized by <sup>1</sup>H and <sup>13</sup>C{<sup>1</sup>H} NMR spectroscopy. The significant recovery of **DPTE** is likely due to the lack of buffering capacity in the preparative-scale reaction.

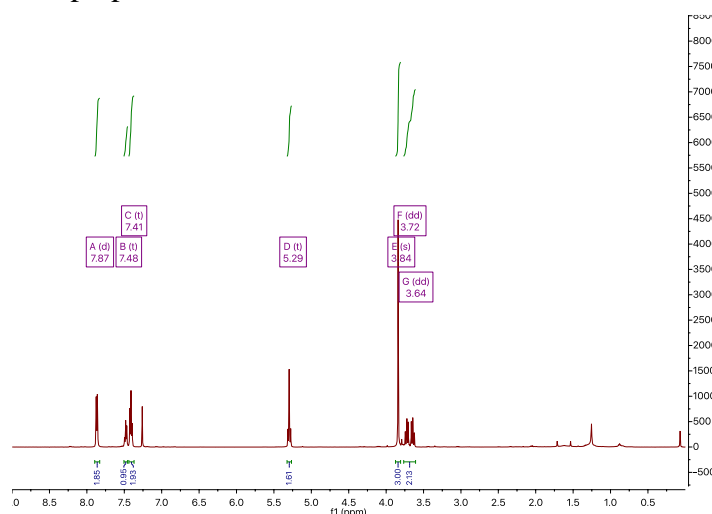

**Figure S5.** <sup>1</sup>H NMR (500 MHz, CDCl<sub>3</sub>) spectrum of isolated **CysDHT**

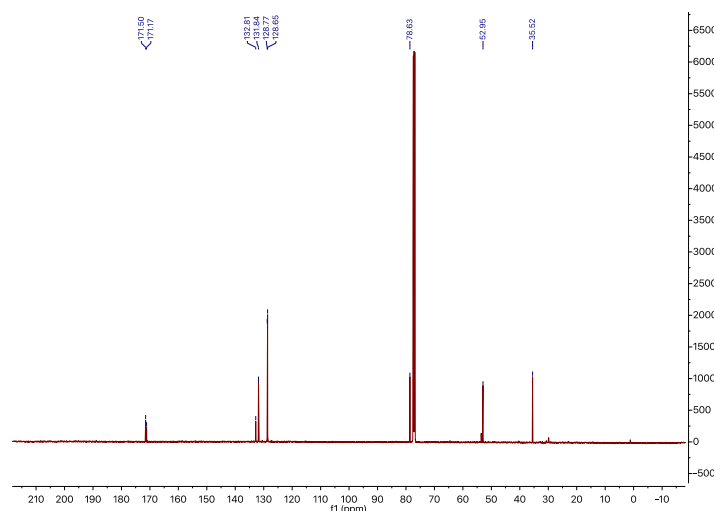

**Figure S6.**  $^{13}\text{C}\{^1\text{H}\}$  NMR (126 MHz,  $\text{CDCl}_3$ ) spectrum of isolated **CysDHT**.

#### Reaction Product Analysis via HPLC

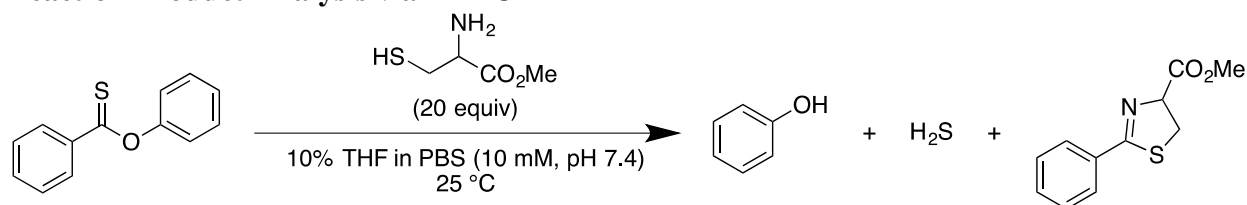

To a 20 mL solution of 10% THF in PBS (10 mM, pH 7.4) containing 2 mM L-cysteine methyl ester (20 equiv.), 20  $\mu\text{L}$  of 100 mM **DPTE** in THF was added and stirred at room temperature. After 1 h, a 1 mL reaction aliquot was analyzed by HPLC. HPLC analysis was performed on an Agilent 1260 HPLC instrument with a Poroshell 120 EC-C18 4.6x100 mm column and monitored at 280 nm. Solvent A: 95%  $\text{H}_2\text{O}$ , 5% MeOH, Solvent B: 100% MeCN. Gradient: 35% Solvent A/65% Solvent B for 2 min. Change to 100% Solvent B over 4 min and hold for 6.5 min. Change to 35% Solvent A/65% Solvent B over 0.5 min and hold for 4.5 min. Flow Rate: 0.5 mL/min, 4  $\mu\text{L}$  injection. The concentration of **CysDHT** and phenol present at the end of the reaction were determined by measurement against calibration curves for each compound.

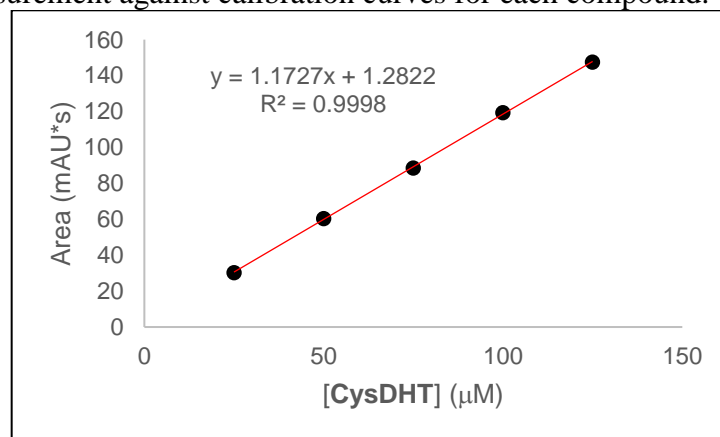

**Figure S7.** HPLC calibration curve of **CysDHT**

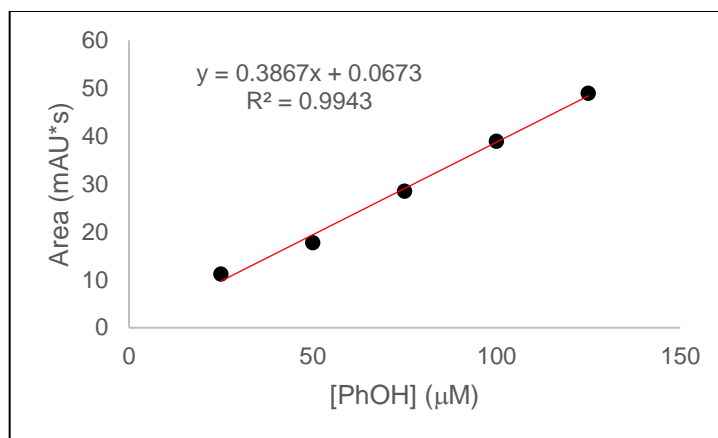

**Figure S8.** HPLC calibration curve of phenol

**References:**

1. Lim, Y.W.; Hewitt, R.J.; Burkett, B.A. *Eur. J. Org. Chem.* **2015**, 2015, 4840-4842.
2. Zhang, G.; Liu, C.; Yi, H.; Meng, Q.; Bian, C.; Chen, H.; Jian, J.-X.; Wu, L.-Z.; Lei, A. *J. Am. Chem. Soc.* **2015**, 137, 9273-9280.
3. Kim, T.S.; Lee, Y.J.; Jeong, B.S.; Park, H.G.; Jew, S.S. *J. Org. Chem.* **2006**, 71, 8276-8278.
